# Supplementary material for: Analyzing Catchment Areas for Home Medical Care Services Using Real-world Claims Data
Source: Research Square preprint supplement (doi:10.21203/rs.3.rs-7140322/v1), 2025-09-03
Supplement: Supplementary file 1 [file 2f27408664bee63f9f8b903e.docx]

Appendix 1 Information on the three groups of municipalities based on population-density

Table A1-1. Municipalities included in each group Population density and population density (i.e., population per habitable area) in each municipality

| low density group | | middle density group | | high density group | |
| --- | --- | --- | --- | --- | --- |
| Kamikitayama | 60 | Uda | 468 | Katsuragi | 1,816 |
| Shimokitayama | 77 | Kurotaki | 473 | Koryo | 2,165 |
| Nosegawa | 81 | Asuka | 524 | Yamatokoriyama | 2,211 |
| Kawakami | 105 | Takatori | 766 | Kawai | 2,255 |
| Totsukawa | 119 | Gose | 878 | Nara | 2,454 |
| Yamazoe | 140 | Oyodo | 955 | Ikaruga | 2,608 |
| Mitsue | 172 | Tenri | 1,235 | Kashihara | 3,237 |
| Soni | 225 | Kawanishi | 1,427 | Ikoma | 3,510 |
| Tenkawa | 291 | Sakurai | 1,433 | Sango | 3,805 |
| Higashiyoshino | 313 | Heguri | 1,494 | Yamatotakada | 3,921 |
| Gojo | 408 | Tawaramoto | 1,505 | Kashiba | 4,317 |
| Shimoichi | 414 | Ando | 1,682 | Kanmaki | 4,359 |
| Yoshino | 425 | Miyake | 1,692 | Oji | 4,564 |
